# Supplementary material for: An Eight-CpG-based Methylation Classifier for Preoperative Discriminating Early and Advanced-Late Stage of Colorectal Cancer
Source: Front Genet. 2021 Jan 13;11:614160. doi: 10.3389/fgene.2020.614160 (PMC7838682; doi:10.3389/fgene.2020.614160)
Supplement: Supplementary file 1 [file Table_1.xlsx]

## Sheet: Supplementary Table S1
Table S1 | Annotation for eight CpG sites selected by LASSO algorithm
CpG site	Chromosome	Position	UCSC RefGene Name	Strand	UCSC RefGene Group	Relation to UCSC CpG Island
cg19922435	4	124913628	LOC285419	R	Body
cg10368049	7	93861732	COL1A2	F	TSS200
cg14931884	10	359977	DIP2C	F	Body	S_Shore
cg23023937	10	133849748	DPYSL4	R	TSS1500	Island
cg05817709	11	63060674	RARRES3	F	TSS200
cg27284627	11	131282792	NTM	F	Body	N_Shelf
cg03124318	12	107976372	USP30	R	Body	S_Shore
cg19330334	15	88809521	IQGAP1	F	Body
