# Supplementary material for: An Eight-CpG-based Methylation Classifier for Preoperative Discriminating Early and Advanced-Late Stage of Colorectal Cancer
Source: Front Genet. 2021 Jan 13;11:614160. doi: 10.3389/fgene.2020.614160 (PMC7838682; doi:10.3389/fgene.2020.614160)
Supplement: Supplementary file 2 [file Table_2.xlsx]

## Sheet: Supplementary Table S2
Table S2 | Clinical characteristics of training set I and test set I
Characteristic	Training set I	Test set I	P value
	(n=260)	(n=112)
Age (Years)
< 66.5	137 (52.7%)	55 (49.1%)	0.602*
>=66.5	123 (47.3%)	57 (50.9%)
Gender
Male	140 (53.8%)	61 (54.5%)	> 0.999*
Female	120 (46.2%)	51 (45.5%)
Histological type
Adenocarcinoma	224 (86.2%)	99 (88.4%)	0.476**
Mucinous	31 (11.9%)	13 (11.6%)
Unknown	5 (1.9%)	0 (0%)
T stage
T1+T2	46 (17.7%)	17 (15.2%)	0.658*
T3+T4	214 (82.3%)	95 (84.8%)
N stage
N0	221 (85.0%)	69 (61.6%)	0.123*
N1+N2	39 (15.0%)	43 (38.4%)
M stage
M0	215 (82.7%)	98 (87.5%)	0.638*
M1	45 (17.3%)	14 (12.5%)
Note: P value was generated from comparison of sample characteristics between training set I and test set I . *, Pearson’s Chi Square test; **, Fisher’s Exact test.
